# Supplementary material
Source: PubMed Central journal article supplement (PMC5927995)
Supplement: 2017_185264-Disclosure.pdf [file 2017_185264-Disclosure.pdf]

Haematologica  
HAEMATOL/2017/185264  
Version 4

Denosumab for bone lesions in multiple myeloma – What is the value?

Daniel A. Goldstein

Disclosures: There are no conflicts of interest
